# Supplementary material for: The MEK inhibitor trametinib separates murine graft-versus-host disease from graft-versus-tumor effects
Source: JCI journal article supplement (doi:10.1172/jci.insight.86331), 2016-07-06
Supplement: sd1 [file 1]

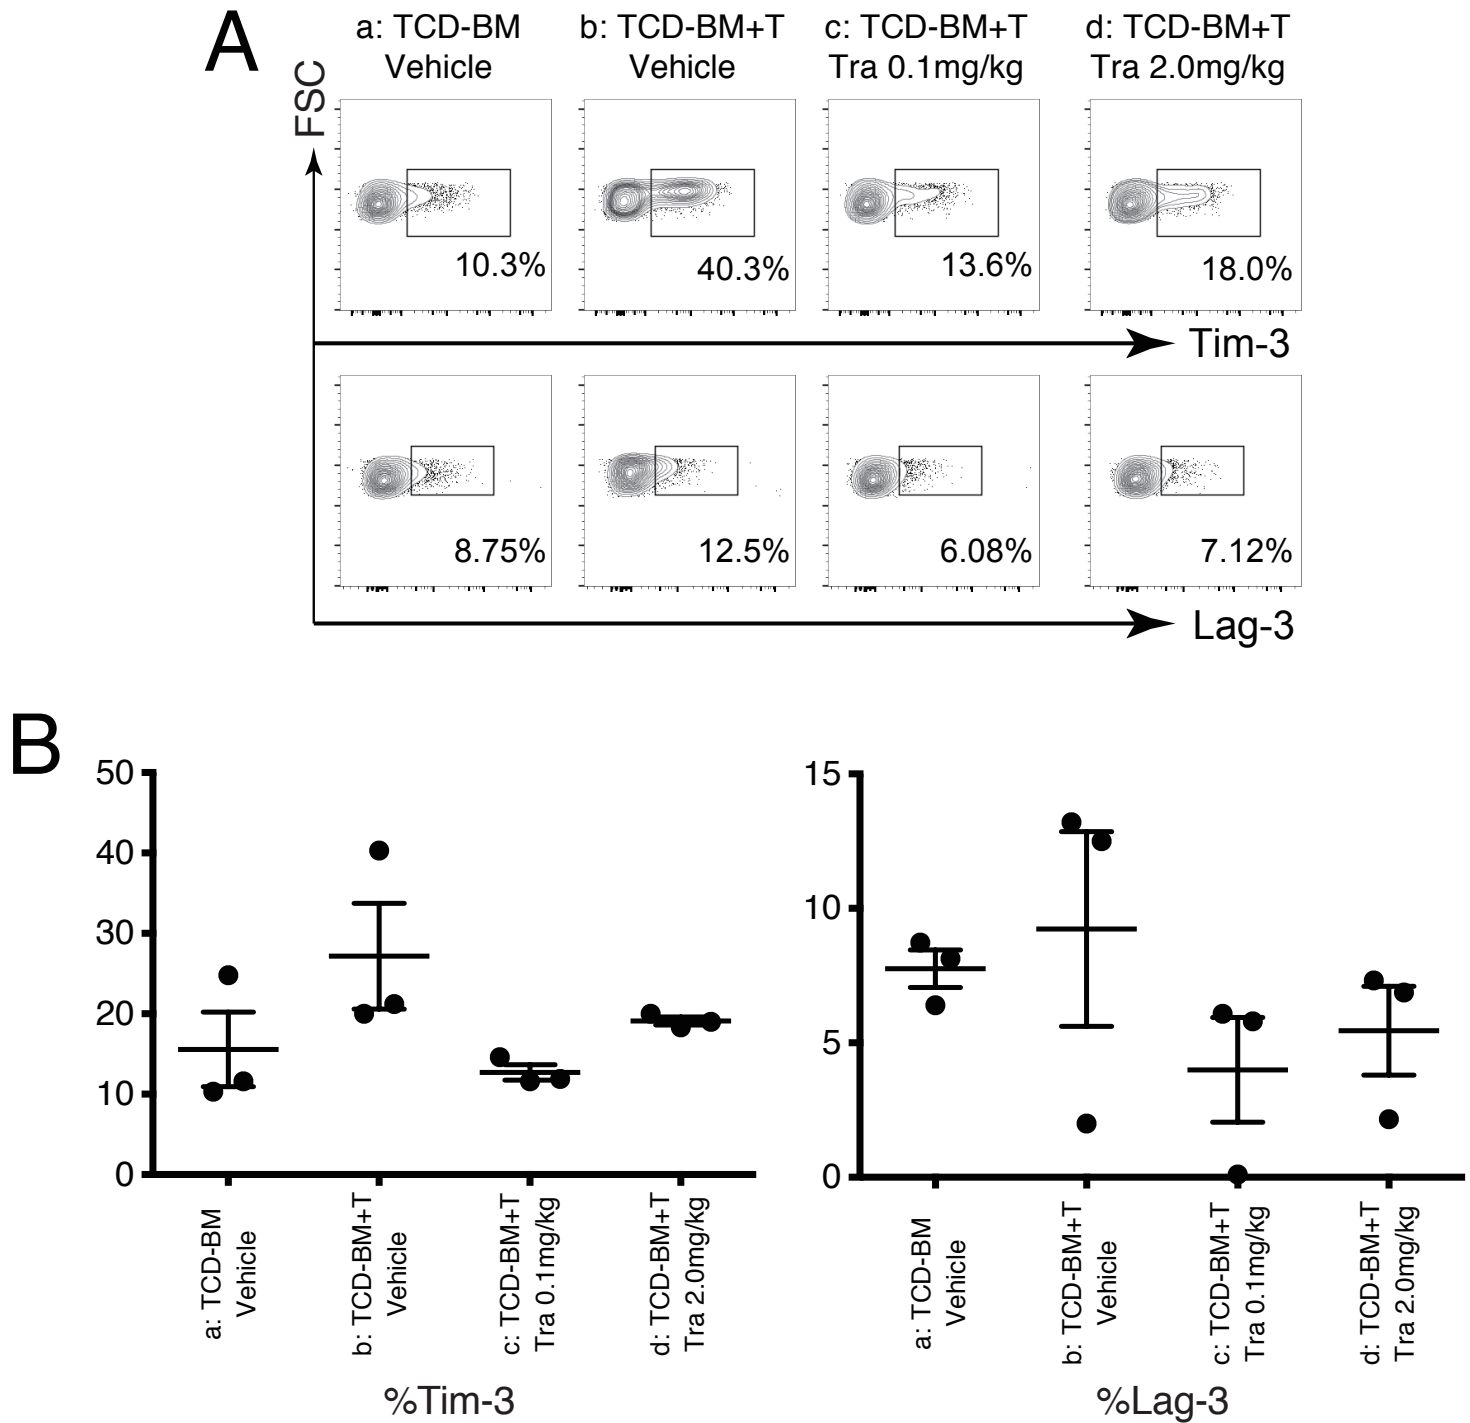

**Supplementary Figure 1. Trametinib down-regulated Tim-3 and Lag-3 of regulatory T cells.** Irradiated B6D2F1 recipients were infused with C57BL/6 TCD-BM  $\pm$  T cells, and the expression of Tim-3 and Lag-3 on CD4<sup>+</sup>CD25<sup>high</sup> regulatory T cells were analyzed by flow cytometry. Representative data in three analyses are shown (A), and individual percentages of the positive cells for each molecule are plotted as the means  $\pm$  SEM (B). Statistical analyses were performed with the two-sided student's *t* test with Bonferroni correction, and no significant differences were detected.
